# Supplementary material for: Endophytic actinomycetes promote growth and fruits quality of tomato (Solanum lycopersicum): an approach for sustainable tomato production
Source: PeerJ. 2024 Jul 10;12:e17725. doi: 10.7717/peerj.17725 (PMC11246020; doi:10.7717/peerj.17725)
Supplement: Supplemental Information 1 [file peerj-12-17725-s001.xlsx]

## Sheet: Growing meterial
TREATMENT	rep	pH	EC(dS/m)	OM(%)	N(%)	P (%)	K(%)	Ca(%)	Mg(%)
Growing meterial	1	7.43	0.66	14.5579	0.727896	0.0699571	0.771848	1.72336	0.0436162
Growing meterial	2	7.35	0.63	16.5836	0.829181	0.0956245	0.744578	1.17762	0.0366027
Growing meterial	3	7.41	0.64	15.6304	0.781518	0.0775819	0.75695	1.15368	0.0291758

## Sheet: Height
		Height (cm)
TREATMENT	rep	14 DAP	28 DAP	56 DAP	112 DAP
Control	1	19.2	40.4	78.4	102.2
Control	2	17.6	34.5	73.8	95.5
Control	3	17.8	38.5	72.6	92.5
TGsR-03-04	1	19.8	36.5	71.6	92.2
TGsR-03-04	2	20	39.5	76.8	96.2
TGsR-03-04	3	18.4	37.1	70.5	94.3
TGsL-02-05	1	20.2	35.6	64.4	88.8
TGsL-02-05	2	17	25	53.8	79
TGsL-02-05	3	19	40.2	68.6	89.8
TGsR-03-04+TGsL-02-04	1	17.2	34.6	72.4	96.4
TGsR-03-04+TGsL-02-05	2	17.2	34.5	65.2	83.8
TGsR-03-04+TGsL-02-05	3	14.8	35.6	73	93.3

## Sheet: Yield and yield quality
TREATMENT	rep	Total yield/plant	Weigh/fruit (g)	Num/plant	Fruit width(mm)	Fruit length(mm)	Brixº (%)
Control	1	1409.59	43.6826	47.4	40.3583	52.4643	6.48
Control	2	1477.78	42.653	31.4	37.444	49.498	6.96
Control	3	1480.04	44.6036	47	40.7037	52.4117	6.68667
TGsR-03-04	1	1247.19	48.0783	45.8	38.7117	49.58	7.25667
TGsR-03-04	2	1319.68	43.8293	45.4	40.5897	53.2547	7.39
TGsR-03-04	3	1404.83	50.224	36.8	41.468	54.2617	6.11
TGsL-02-05	1	1401.27	42.746	60.6	39.1873	48.9627	6.83667
TGsL-02-05	2	1502.02	41.2817	47.8889	37.5984	47.2667	7.08
TGsL-02-05	3	1510.57	41.539	47.8	39.095	49.9813	7.07
TGsR-03-04+TGsL-02-04	1	1323.1	39.9717	49	37.8457	50.0123	7.14
TGsR-03-04+TGsL-02-05	2	1218.94	44.0777	43.8	41.573	49.167	5.95333
TGsR-03-04+TGsL-02-05	3	1211.68	41.5857	45.2	38.0837	48.2973	6.94

## Sheet: substance
TREATMENT	rep	Vitamin C (mg/100g)	Antioxidant (µmol TE/g sample)	Lycopene (µg/g)
Control	1	17.4	103.563	78.6609
Control	2	15.3392	93.3377	73.8875
Control	3	18.5841	97.7199	87.525
TGsR-03-04	1	21.2389	105.023	116.349
TGsR-03-04	2	25.6637	98.998	142.618
TGsR-03-04	3	23.0088	95.7114	178.778
TGsL-02-05	1	12.5664	102.285	67.9672
TGsL-02-05	2	12.3894	105.023	65.1917
TGsL-02-05	3	11.7994	92.79	99.7583
TGsR-03-04+TGsL-02-04	1	12.9794	101.919	111.042
TGsR-03-04+TGsL-02-05	2	12.9794	101.919	124.004
TGsR-03-04+TGsL-02-05	3	15.0442	107.032	160.349
